# Supplementary material for: Tuning the Phosphoryl Donor Specificity of Dihydroxyacetone Kinase from ATP to Inorganic Polyphosphate. An Insight from Computational Studies
Source: Int J Mol Sci. 2015 Nov 24;16(11):27835–49. doi: 10.3390/ijms161126073 (PMC4661931; doi:10.3390/ijms161126073)
Supplement: Supplementary file 1 [file ijms-16-26073-s001.pdf]

# Supplementary Materials: Tuning the Phosphoryl Donor Specificity of Dihydroxyacetone Kinase from ATP to Inorganic Polyphosphate. An Insight from Computational Studies

Israel Sánchez-Moreno, Isabel Bordes, Rocío Martín-Hoyos, Raquel Castillo, José Javier Ruiz-Pernia, Vicent Moliner and Eduardo García-Junceda

**Table S1.** Polyphosphate-dependent kinase activities of the wild-type and mutant enzymes <sup>a</sup>.

| Enzyme                                   | wtDHAK            | 1H2  | 2C1 | 2D1 | 2H3  | 3C3 | 3E4 | 3H2 | 4B3 |
|------------------------------------------|-------------------|------|-----|-----|------|-----|-----|-----|-----|
| Specific activity (mU·mg <sup>-1</sup> ) | n.d. <sup>b</sup> | 13.4 | 2.6 | n.d | 1.9  | n.d | 7.7 | n.d | 0.1 |
| Enzyme                                   | -                 | 5A2  | 5B1 | 5C1 | 5F12 | 6A3 | 6D5 | 6D6 | 6F2 |
| Specific activity (mU·mg <sup>-1</sup> ) | -                 | 3.0  | 2.7 | n.d | 10.5 | n.d | n.d | n.d | 0.4 |

<sup>a</sup> Nomenclature of mutant enzymes is arbitrary and corresponds to the coordinates in the micro-plate; <sup>b</sup> n.d = not detected.

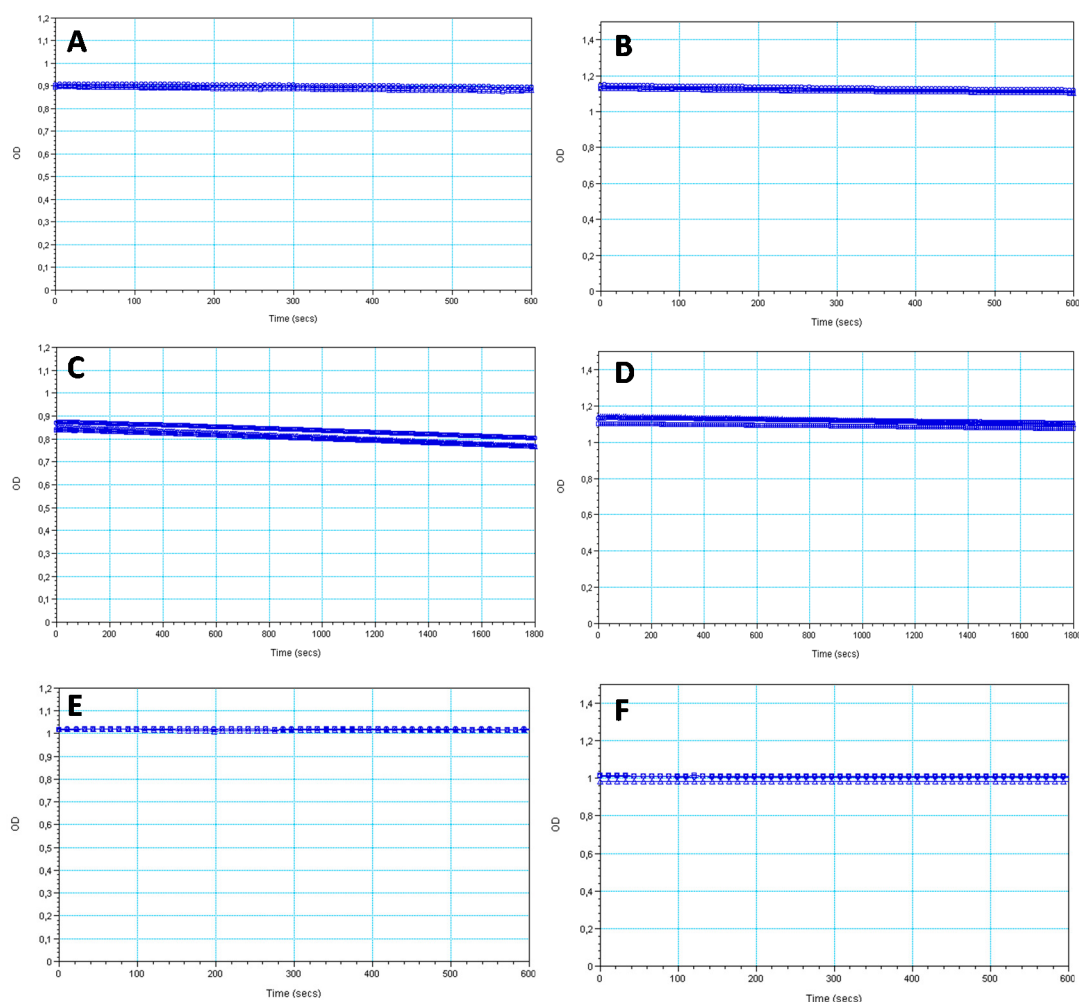

**Figure S1.** Absorbance at 340 nm was recorded along the time in triplicate reactions containing poly-P and mutant 1H2 (A); The same assay was performed with wild type DHAK enzyme (C); When DHA was added into the pre-incubated reactions, significant slope differences were observed in 1H2 mutant reactions (B) but no in DHAK wt ones (D); In order to exclude any spontaneous chemical phosphorylation, control reactions were incubated in absence of the corresponding enzyme: poly-P/DHA mixture without 1H2 mutant (E);and ATP/DHA mixture without DHAK wt (F).

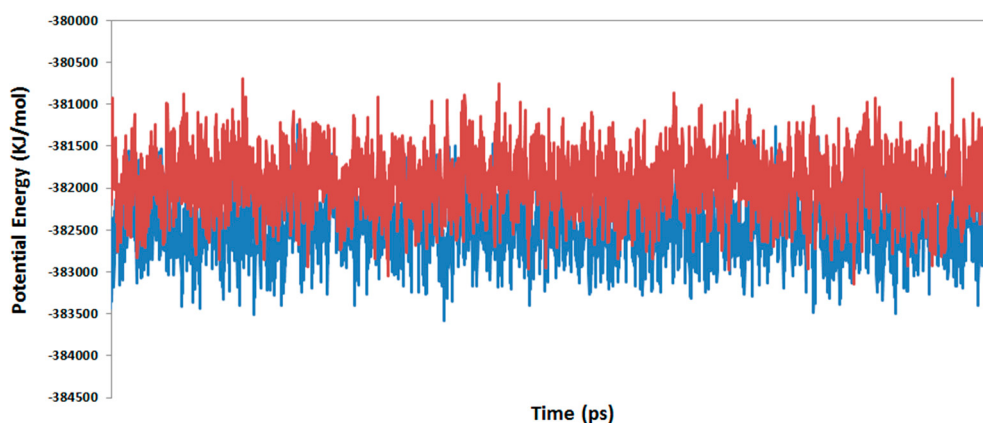

**Figure S2.** Time evolution of the potential energy of the full system in the wild-type (blue line) and mutated enzyme (red line).

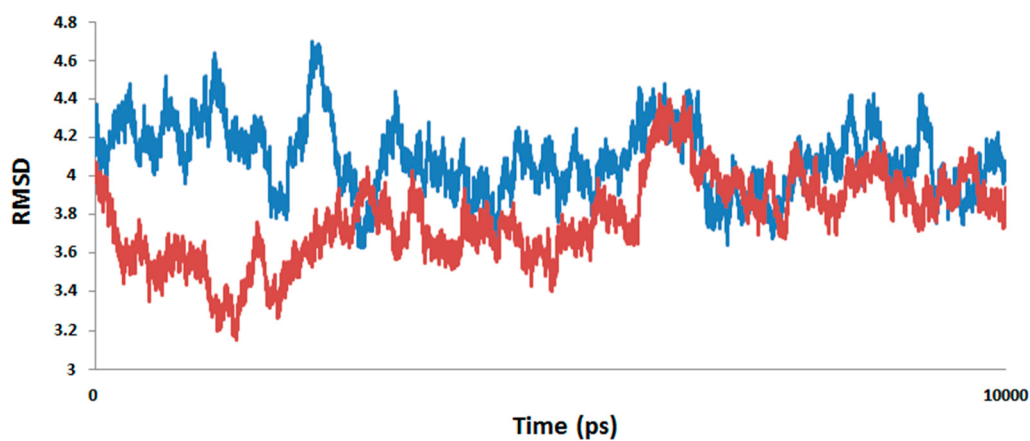

(a)

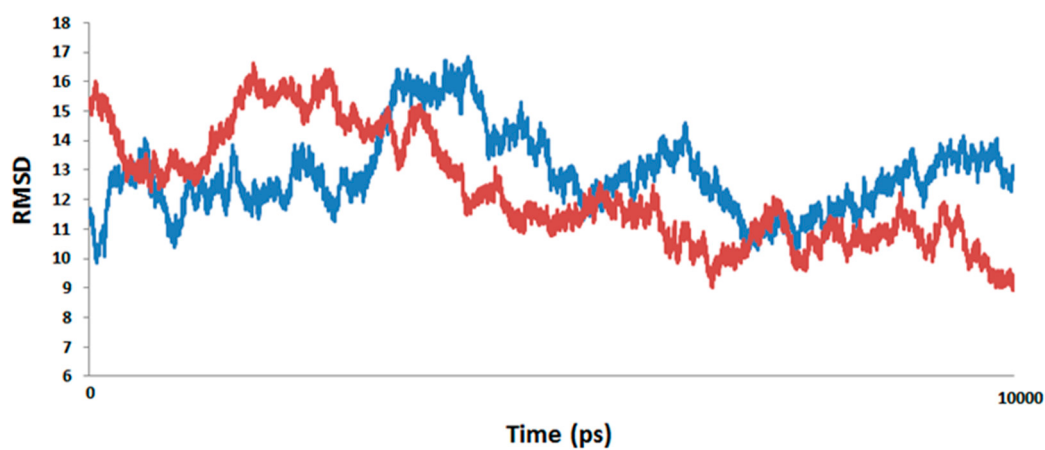

(b)

**Figure S3.** (a) RMSD of the carbon-alpha atoms of the protein in the wild type (blue line) and in the mutated enzyme (red line); (b) RMSD of the phosphorus atoms of poly-P along the last 5 ns of MD simulation in the wild type (blue line) and mutated enzyme (red line).

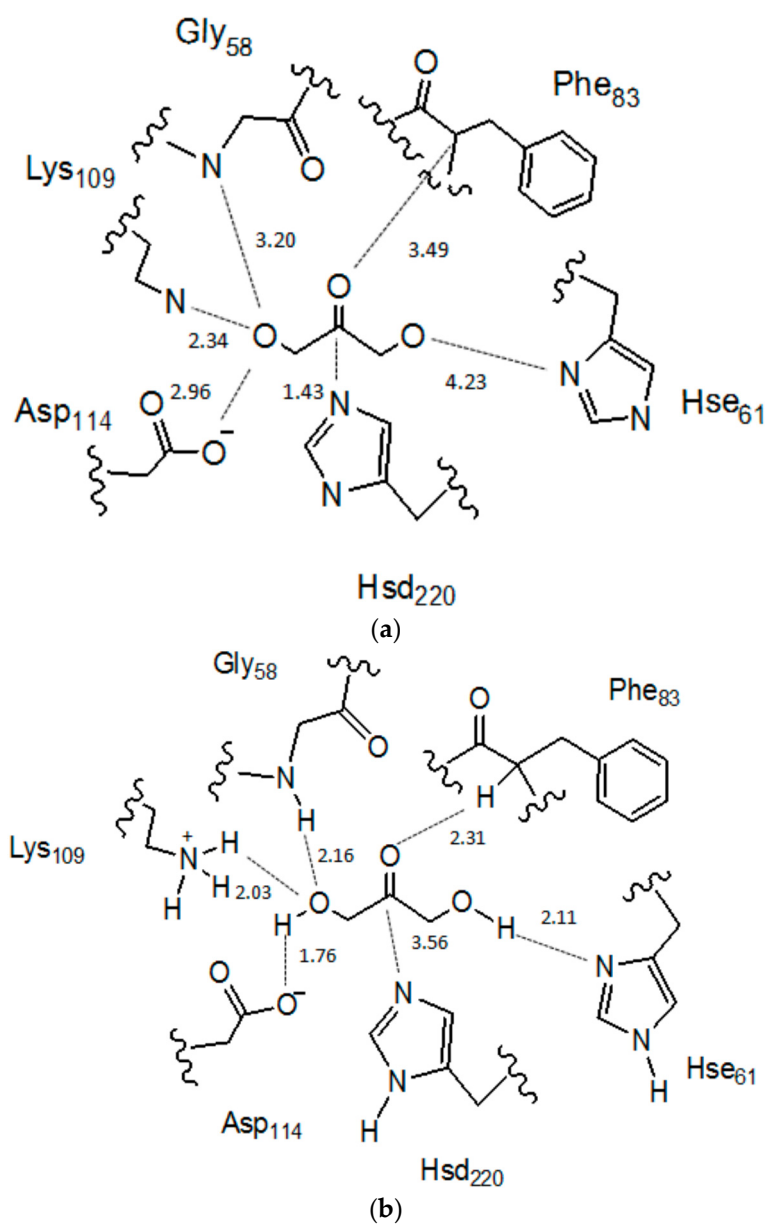

**Figure S4.** Schematic representation of the active site in the initial X-ray diffraction structure 1UN9 (a); and in the wild-type after 10 ns of MD simulations (b). Key distances between DHA and the residues of the active site are reported in Å.
